# Supplementary material for: Effectiveness of Video Teletherapy in Treating Obsessive-Compulsive Disorder in Children and Adolescents With Exposure and Response Prevention: Retrospective Longitudinal Observational Study
Source: J Med Internet Res. 2025 Jan 27;27:e66715. doi: 10.2196/66715 (PMC11811664; doi:10.2196/66715)
Supplement: Multimedia Appendix 1 [file jmir_v27i1e66715_app1.docx]

**Supplementary Information**

**Effectiveness of Video Teletherapy in Treating Child and Adolescent Obsessive-Compulsive Disorder with Exposure and Response Prevention: a Retrospective Longitudinal Observational Study**

Authors:

Jamie D. Feusner1-4, Nicholas R. Farrell1, Mia Nuñez1, Nicholas Lume1, Catherine W. MacDonald1, Patrick B. McGrath1, Larry Trusky1, Stephen Smith1, Andreas Rhode1

1NOCD, Inc., Chicago, IL, 60601, USA

2Department of Psychiatry, University of Toronto, Toronto, ON, Canada

3Centre for Addiction and Mental Health, Toronto, ON, Canada

4Department of Women’s and Children’s Health, Karolinska Institutet, Stockholm, Sweden

1. Supplementary Figures: Example App Screenshots


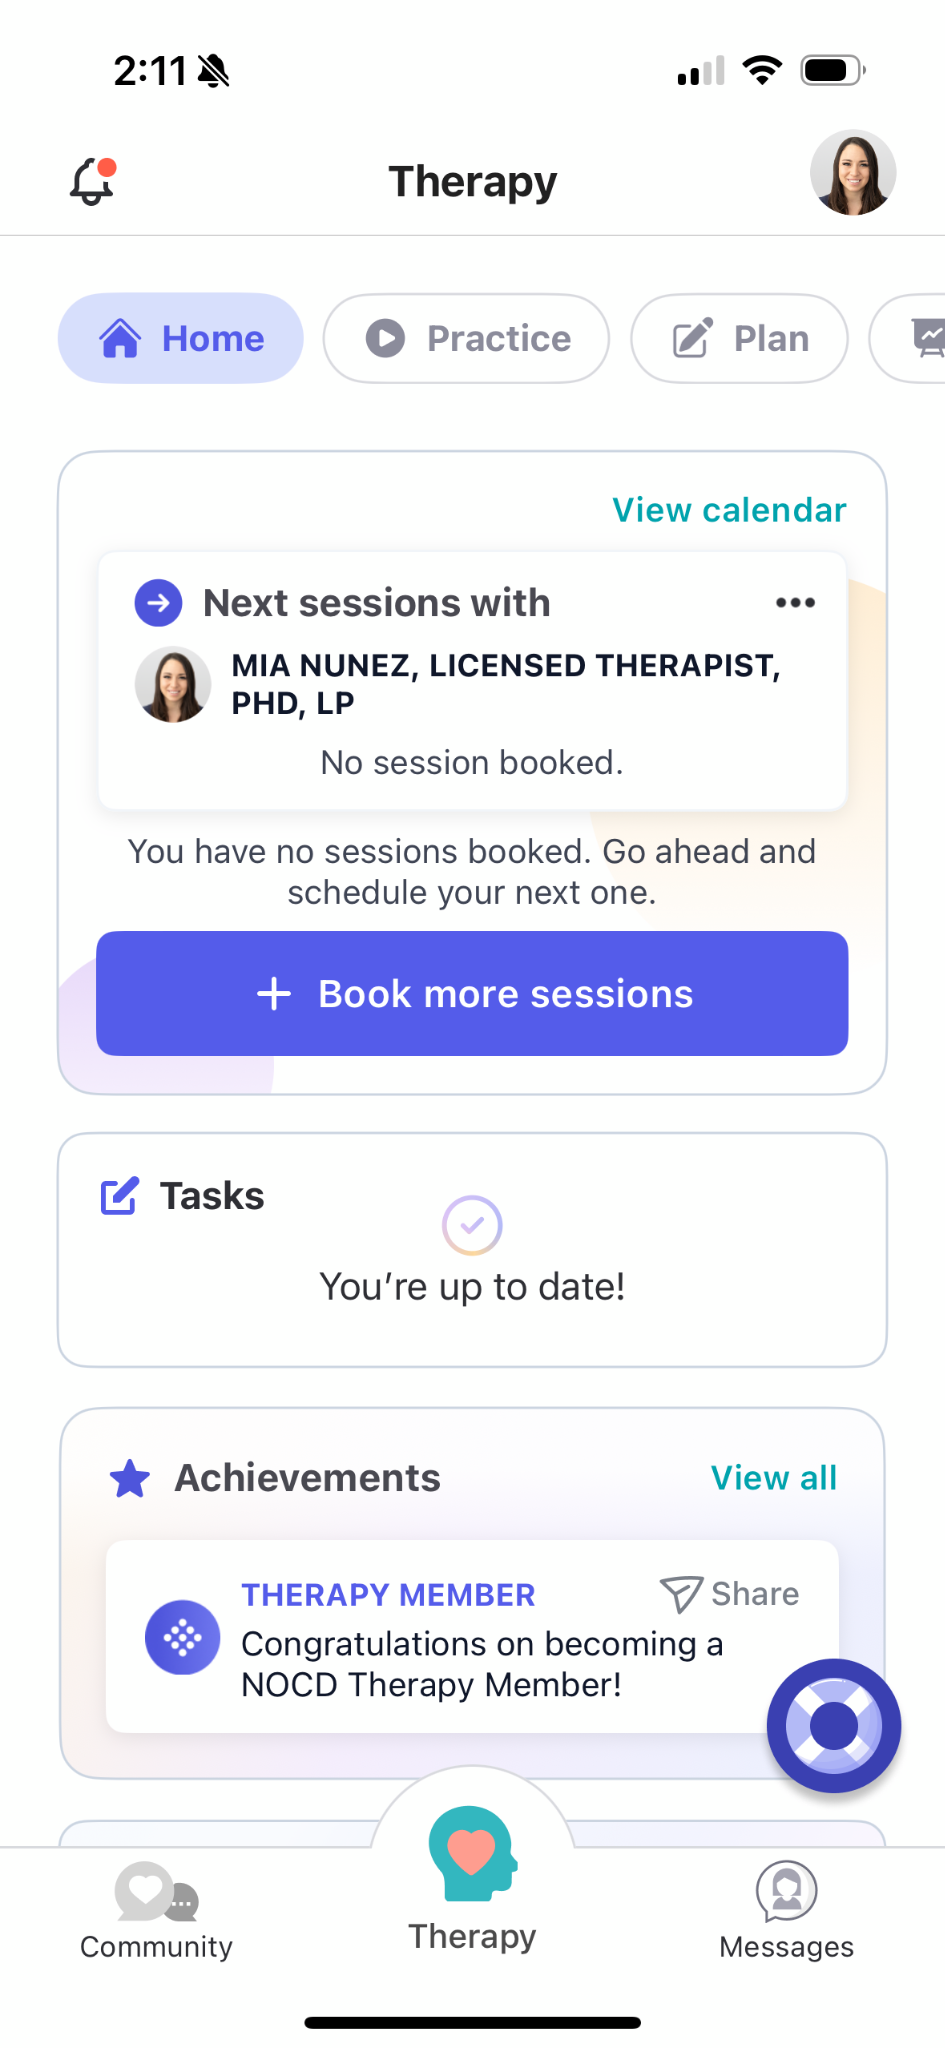


Fig. 1. NOCD App homescreen


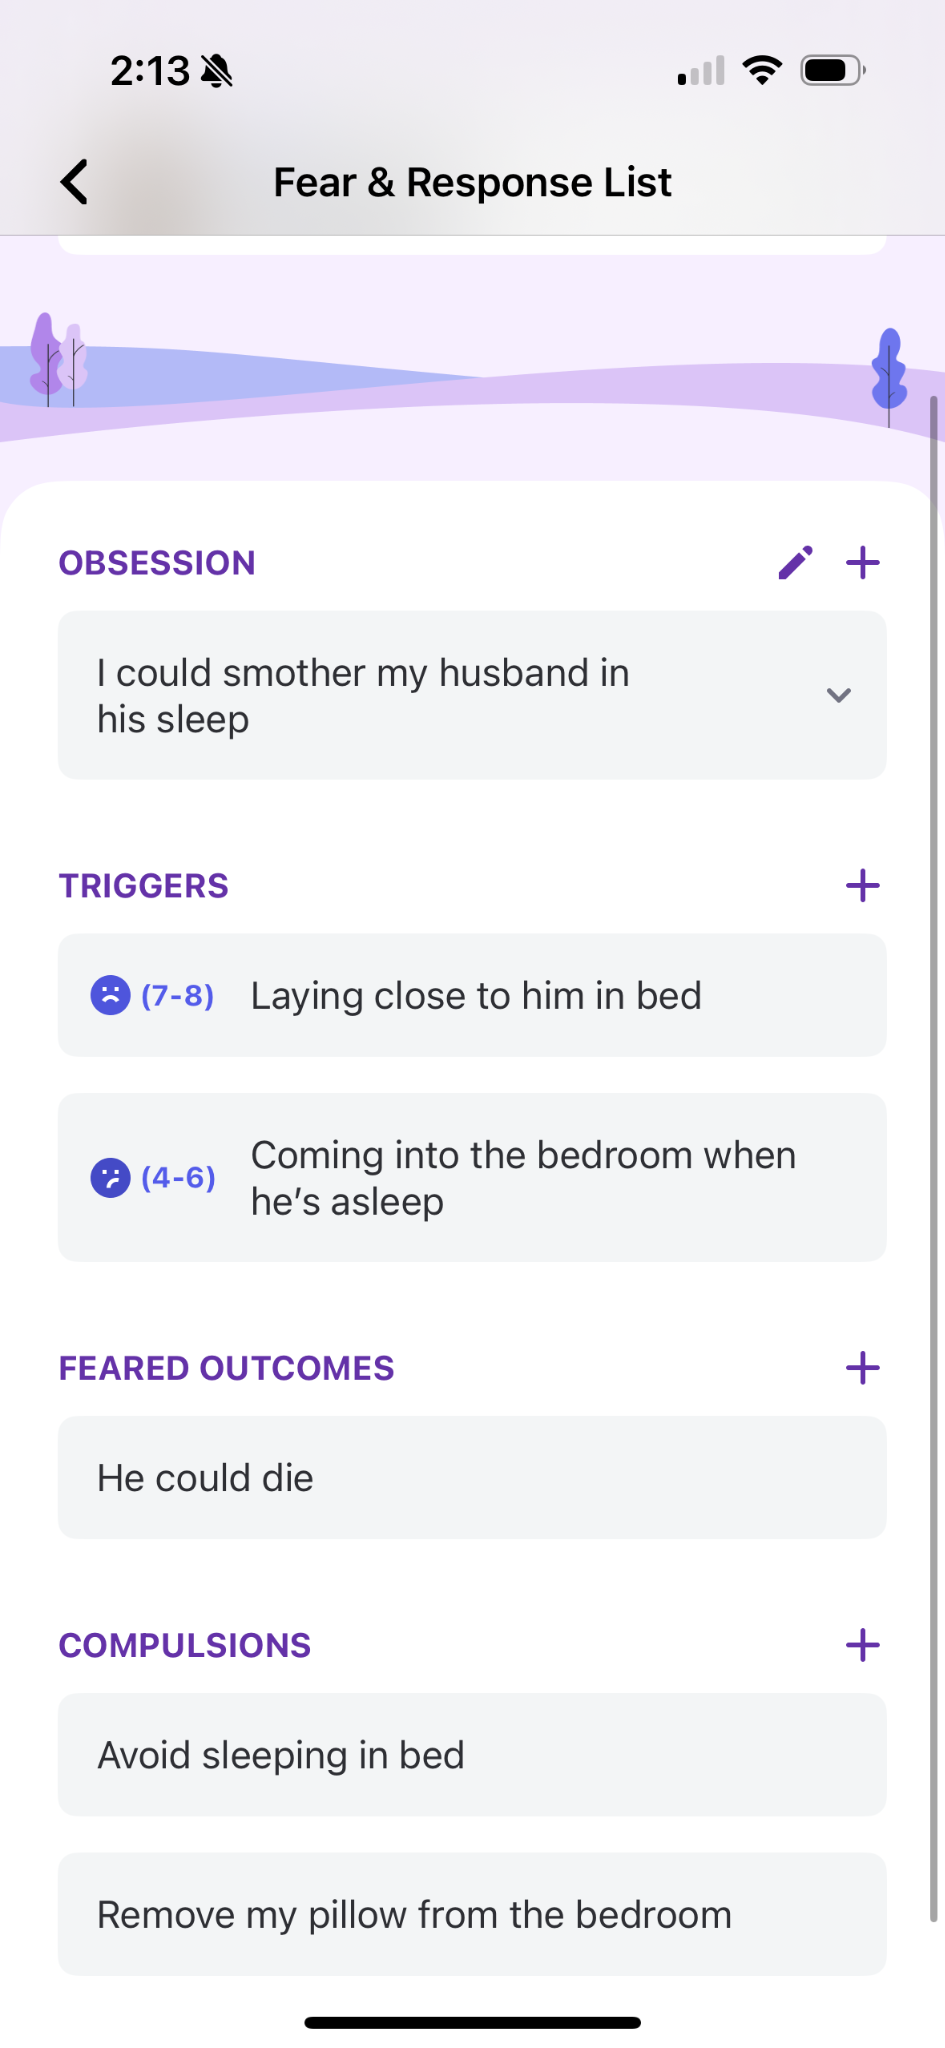


Fig. 2. NOCD App self-monitoring and hierarchy building tool, called “Fears and Response List”


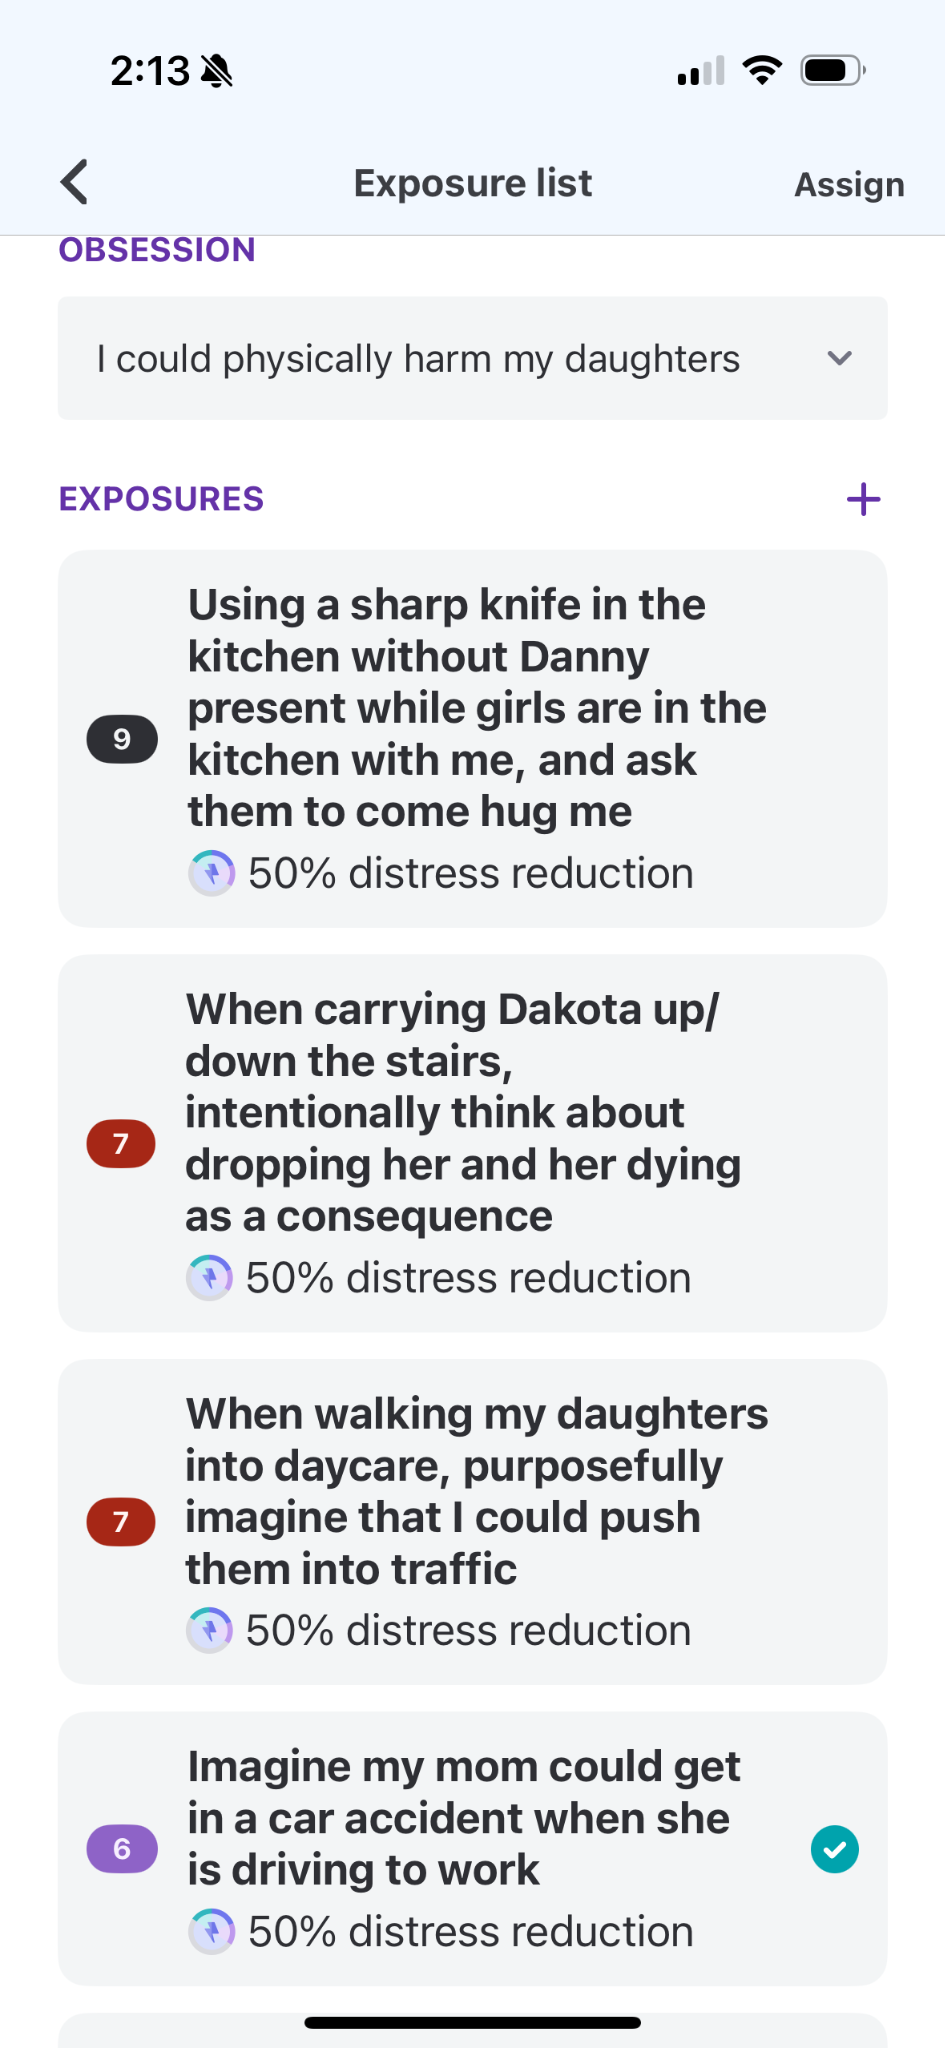


Fig. 3. NOCD App hierarchy


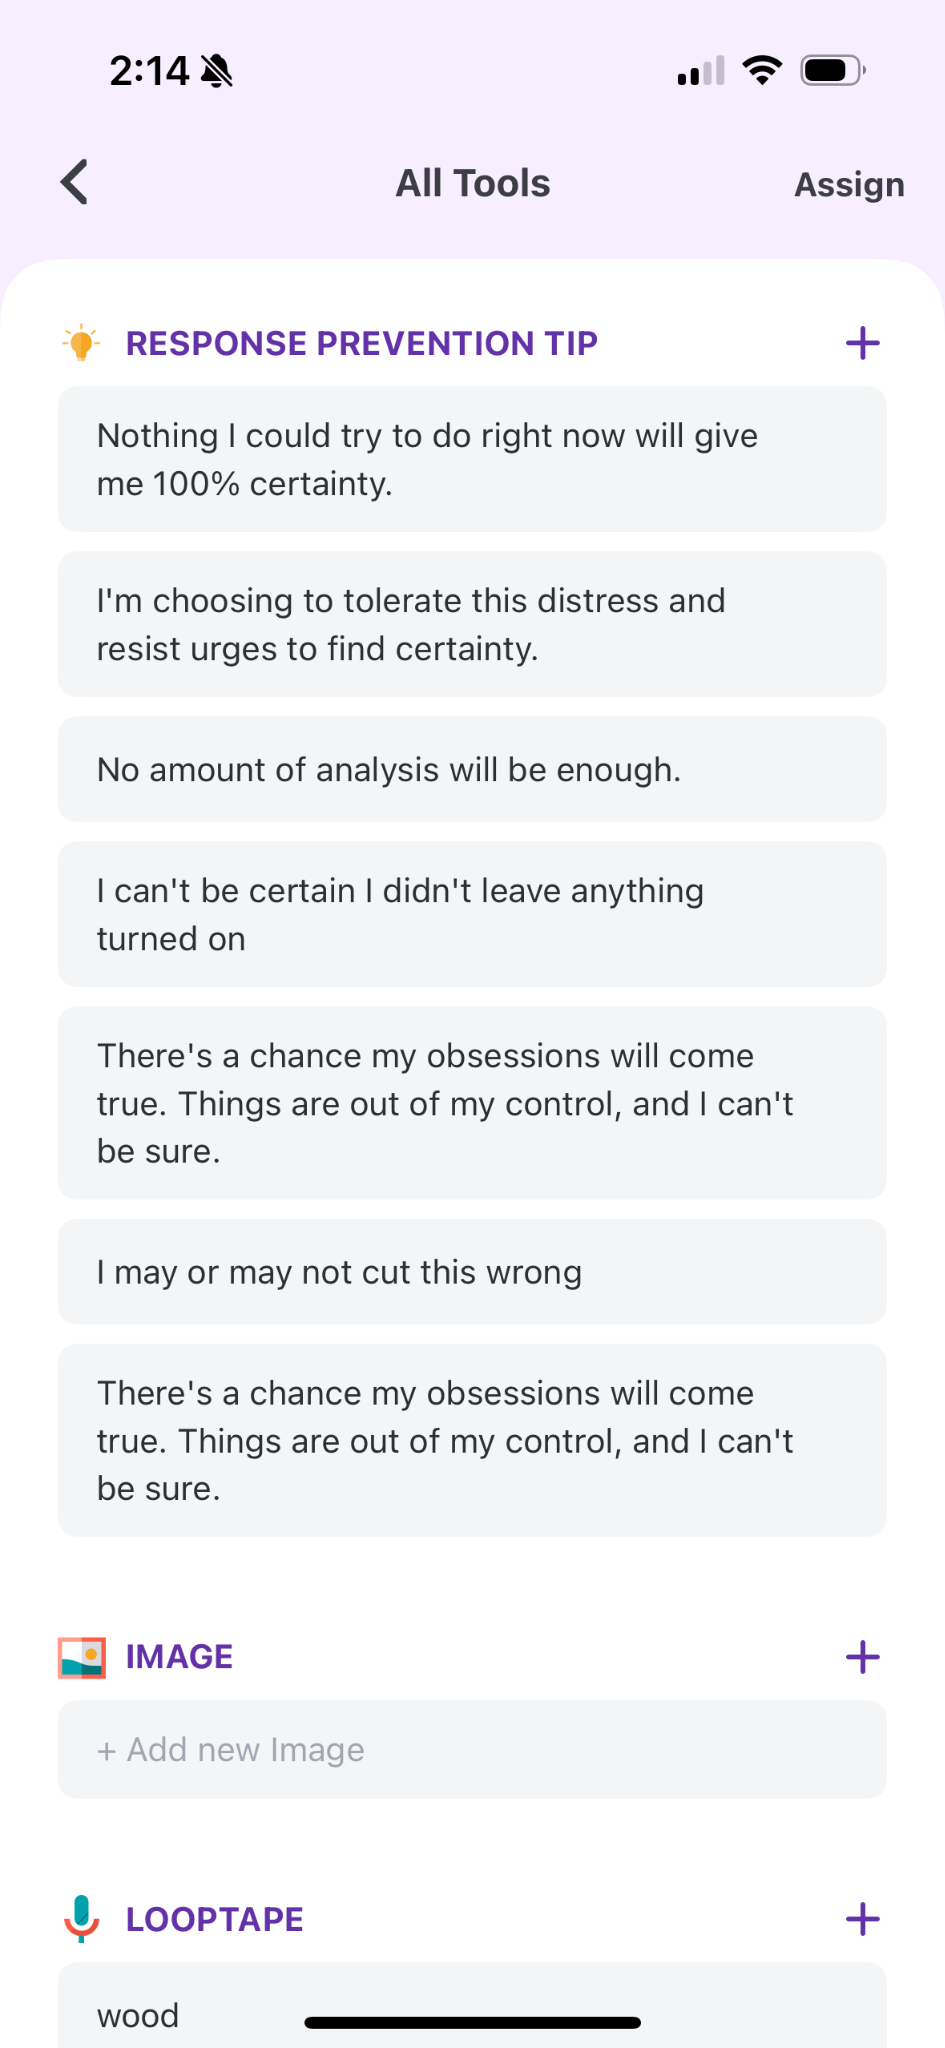

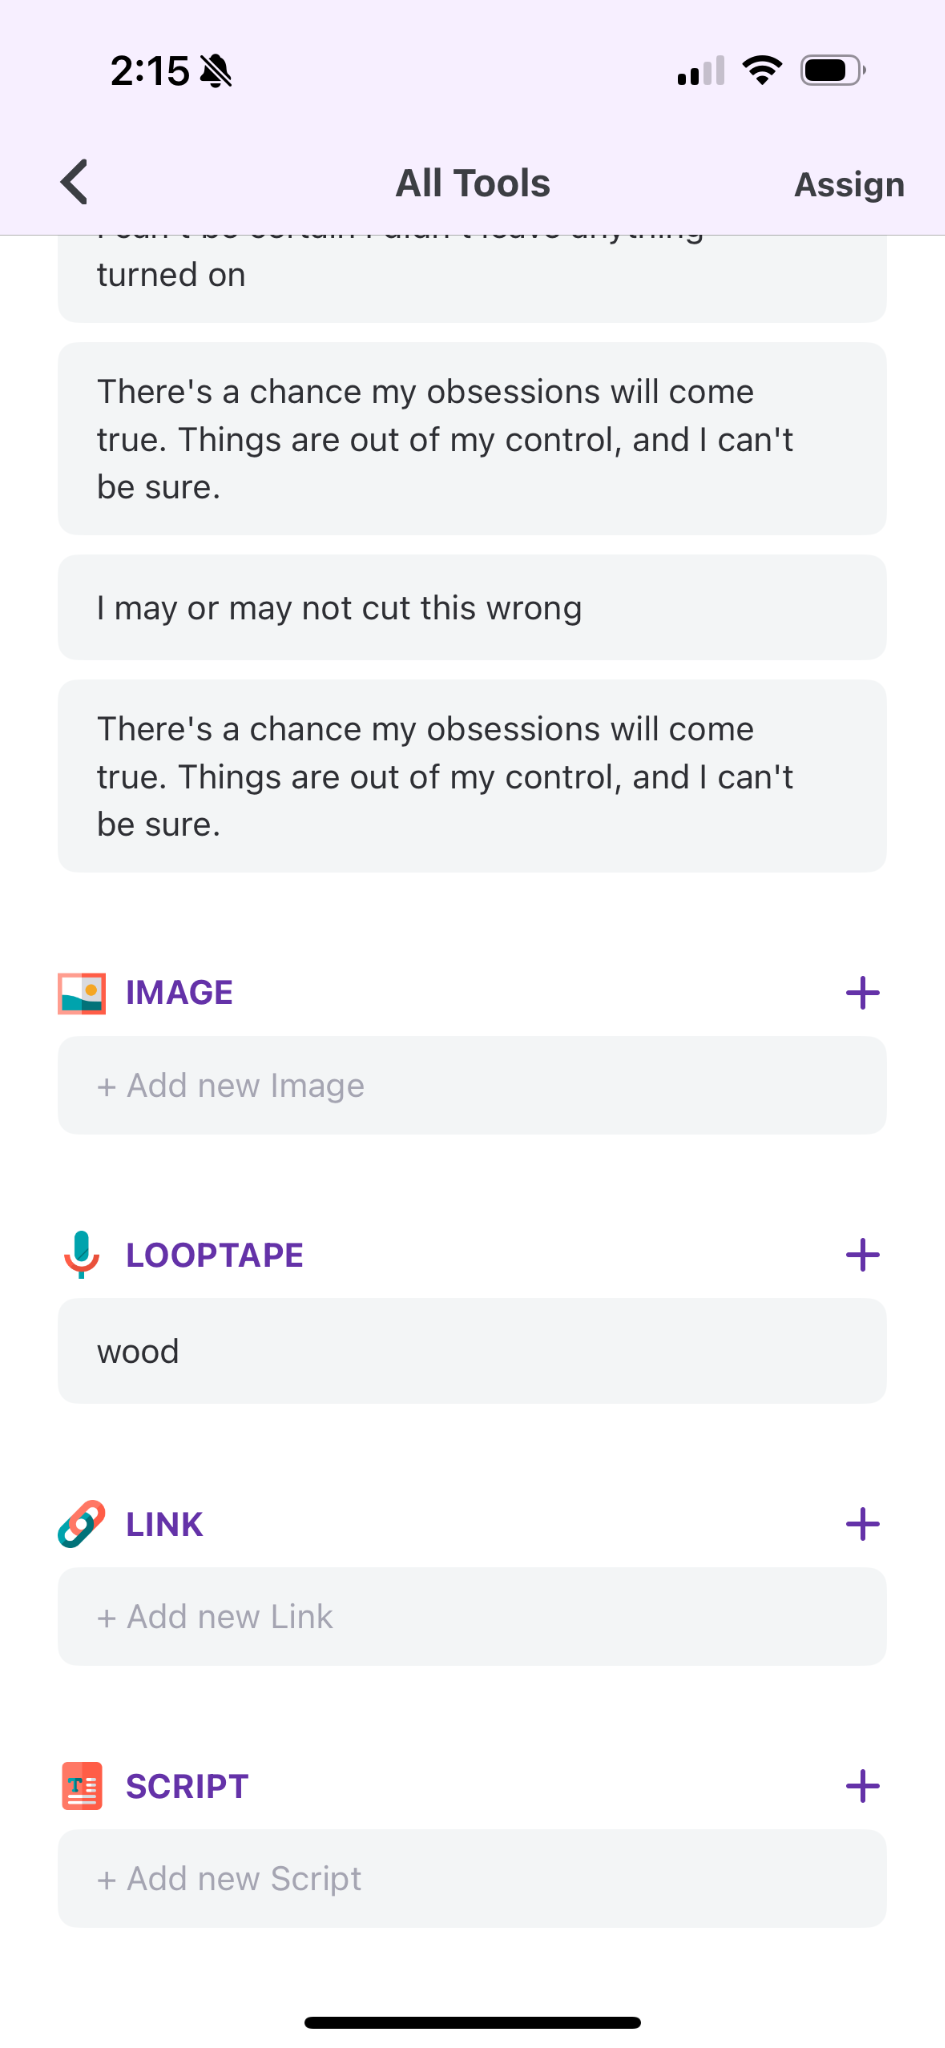


Fig. 4. NOCD App Tools; Response prevention tips and functionality to for therapist or Member to upload images, looptapes, links, and scripts for exposures.


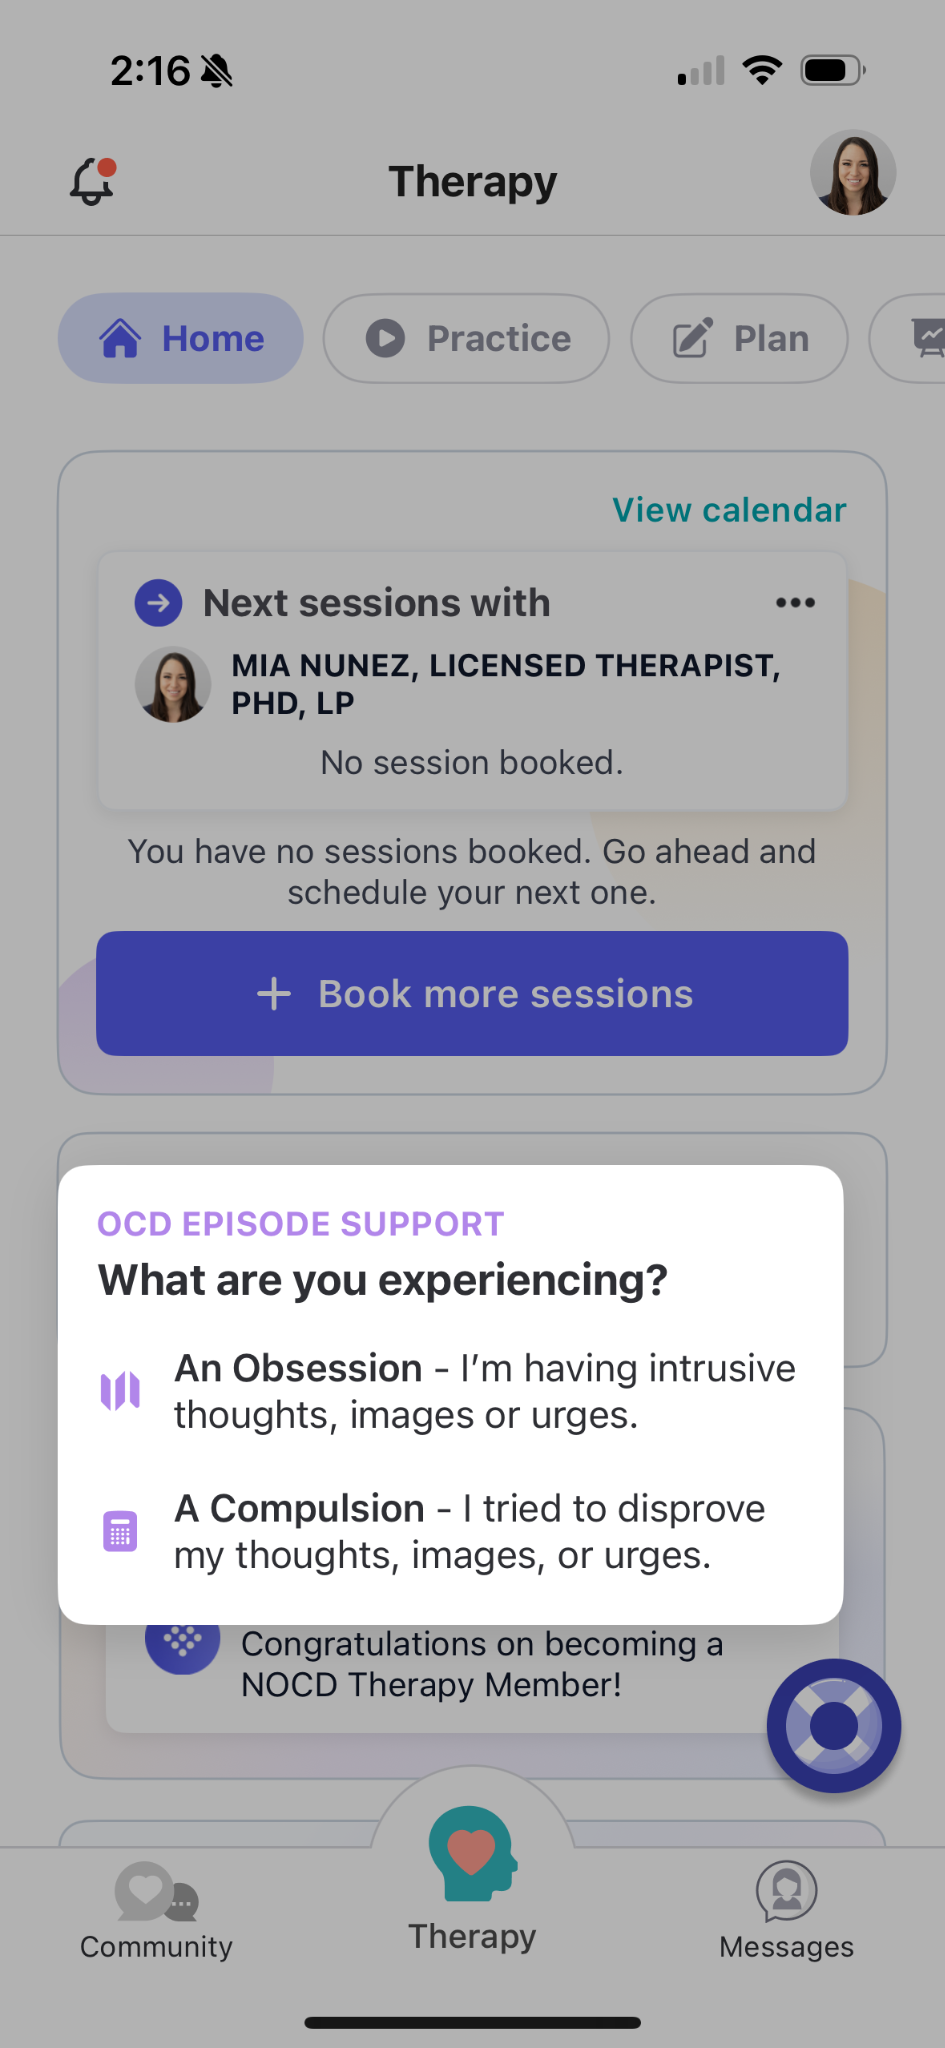

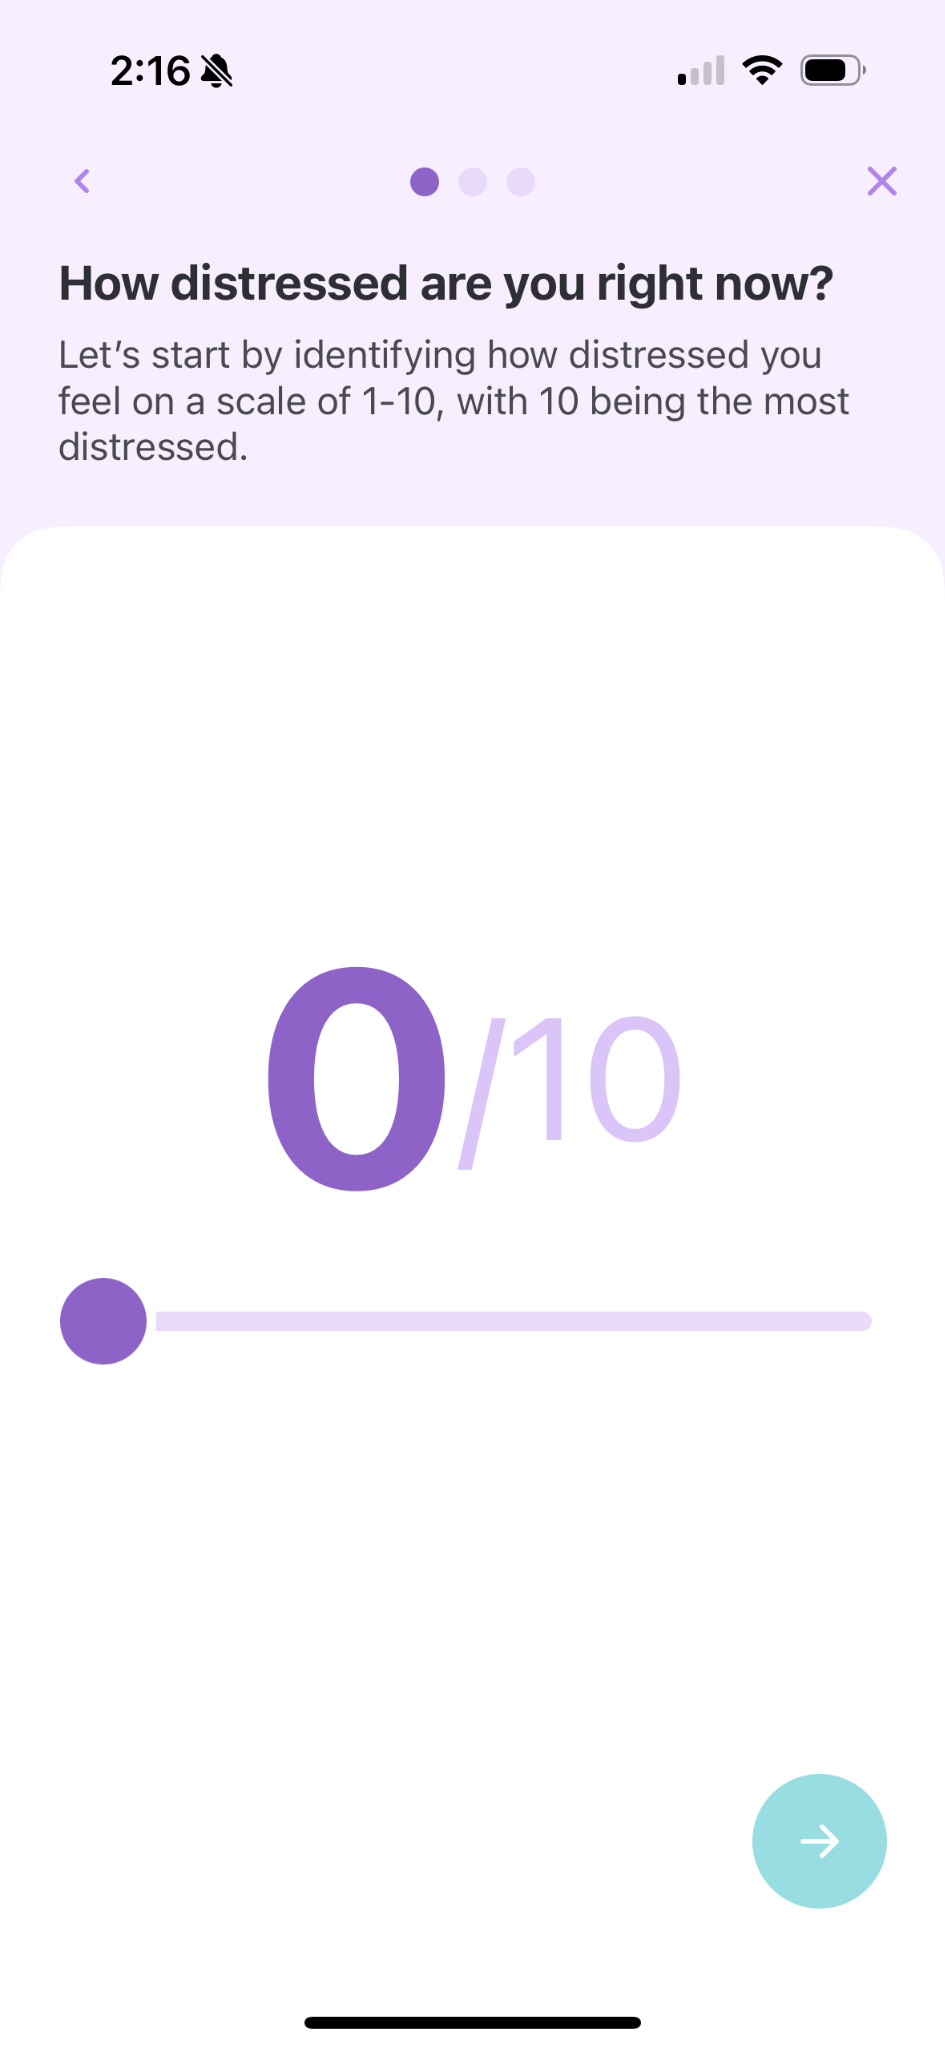

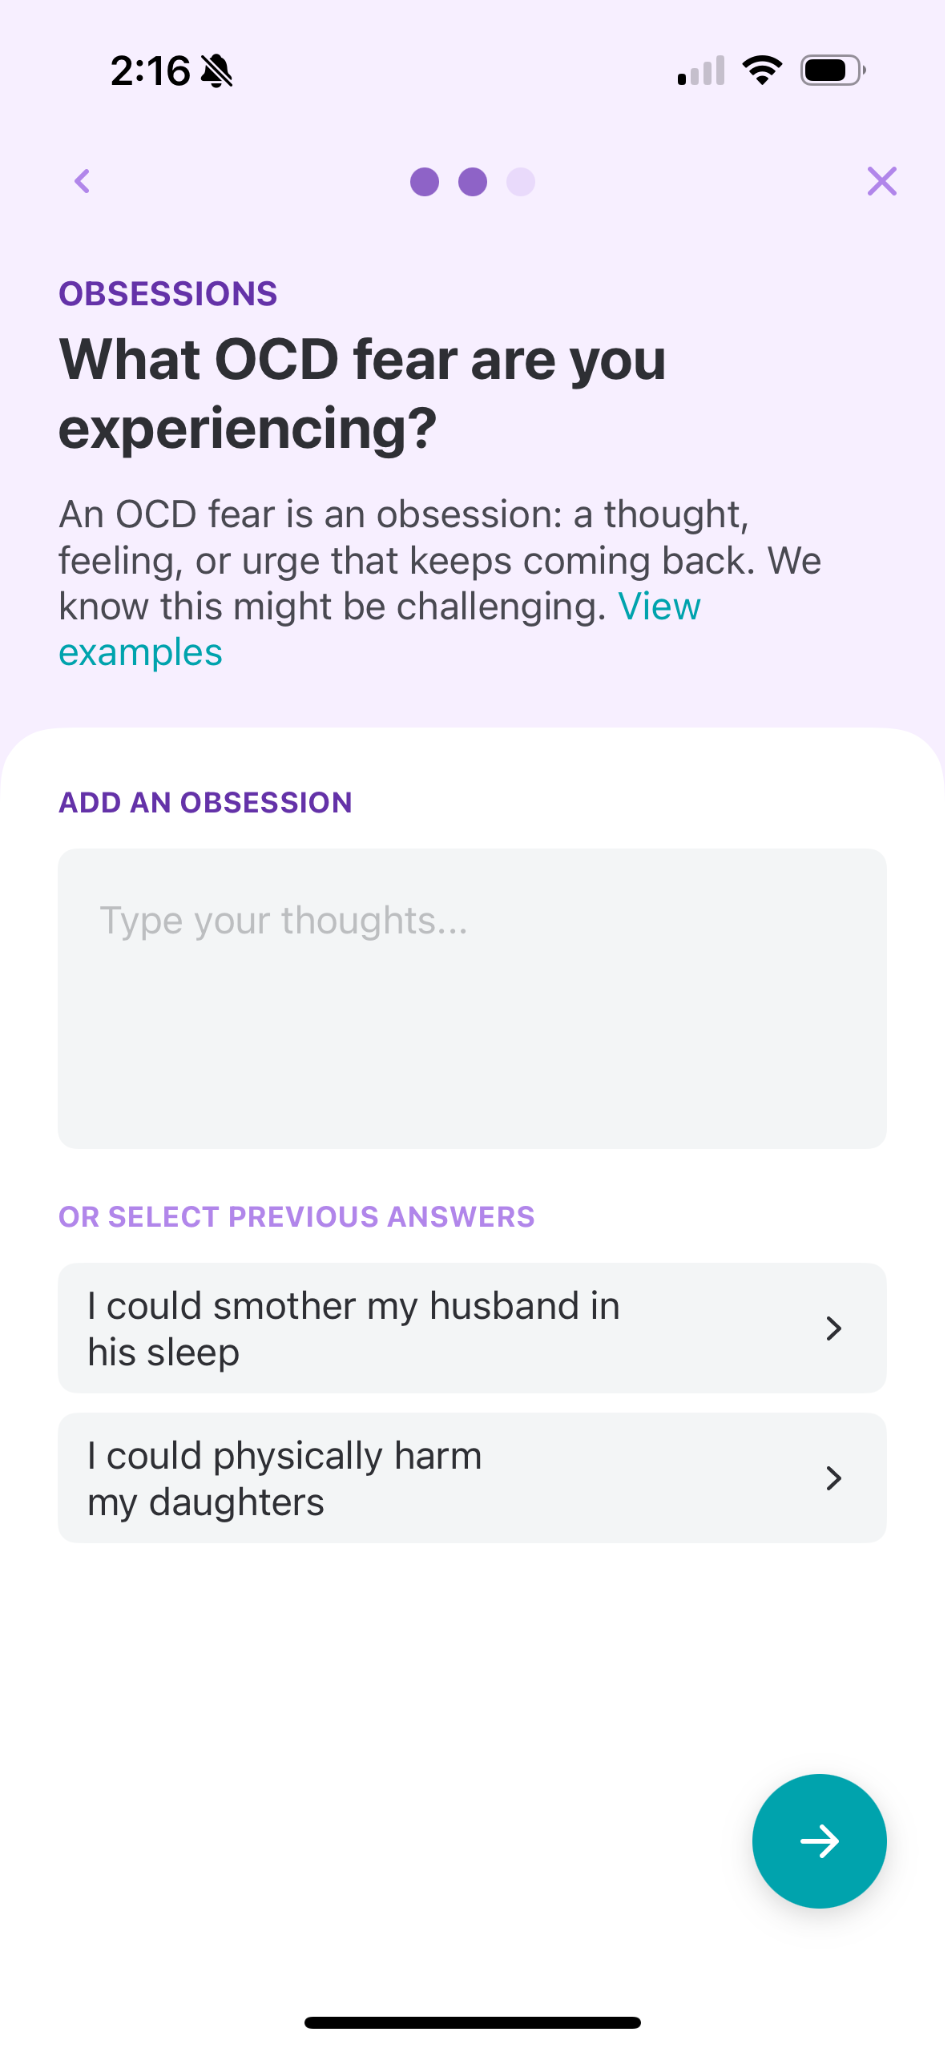

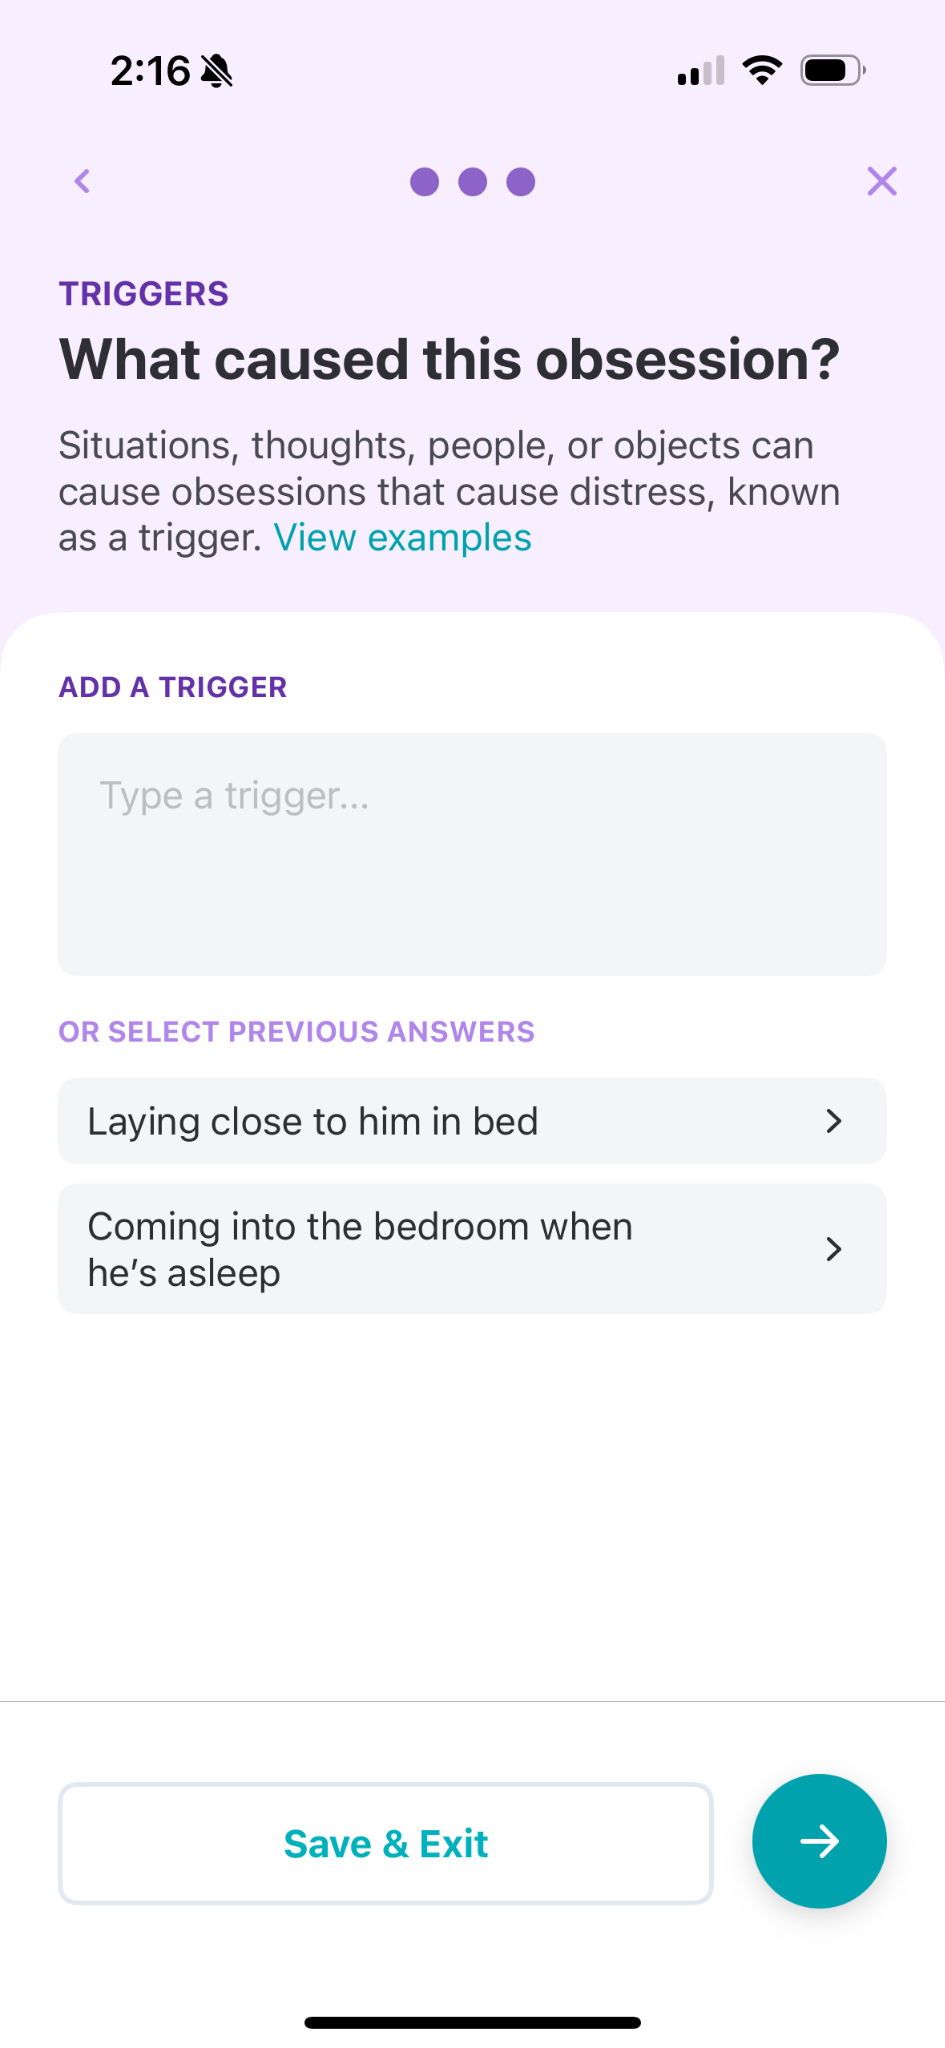

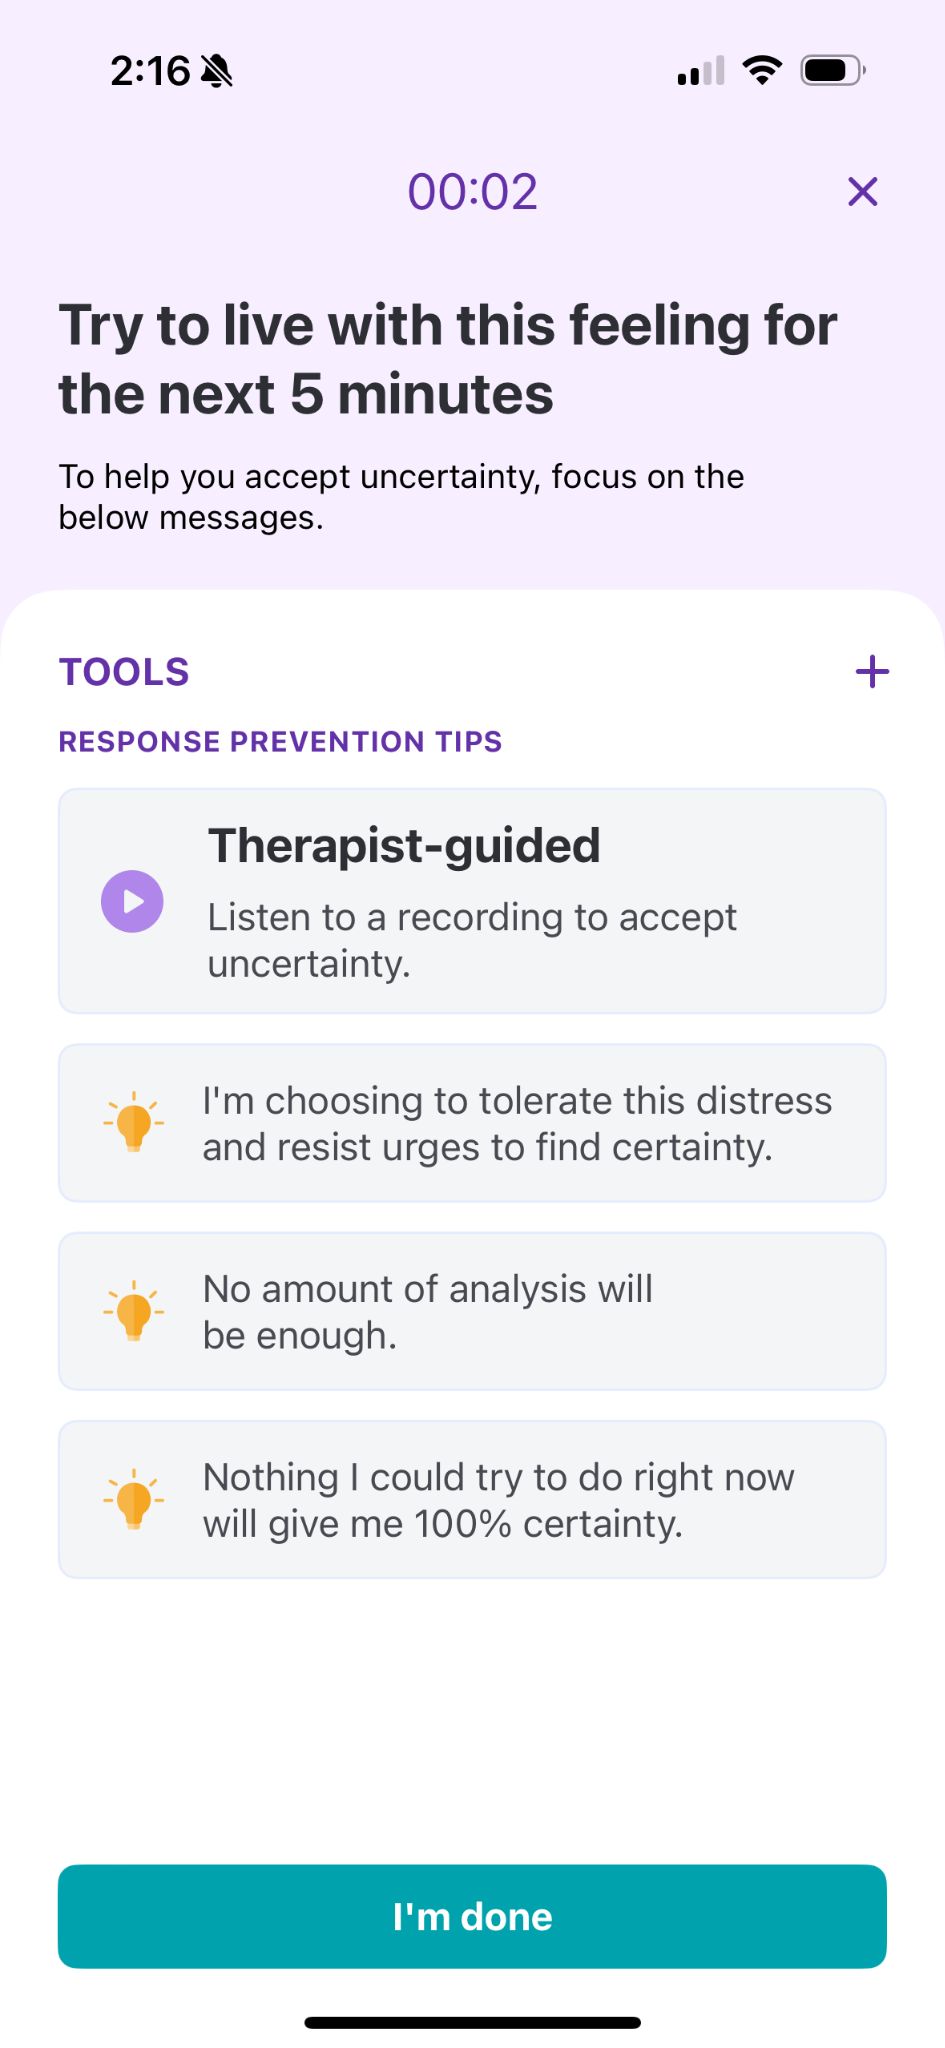


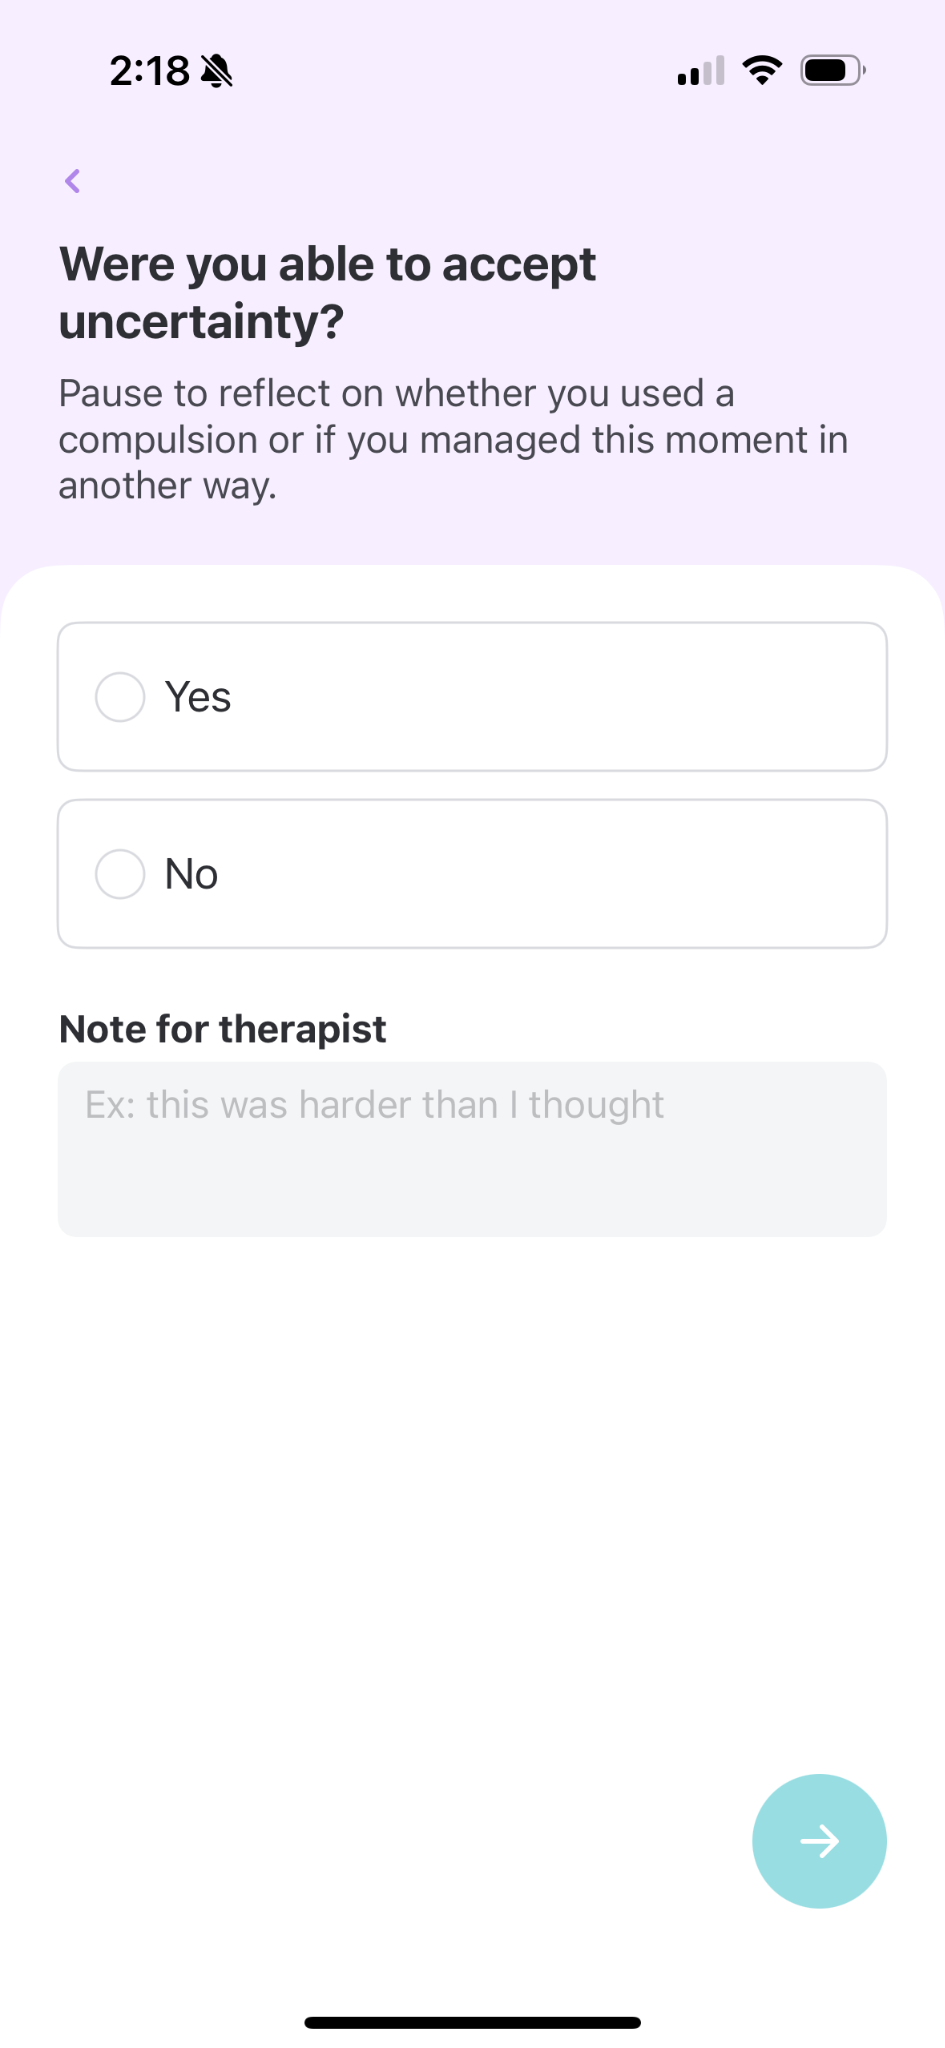

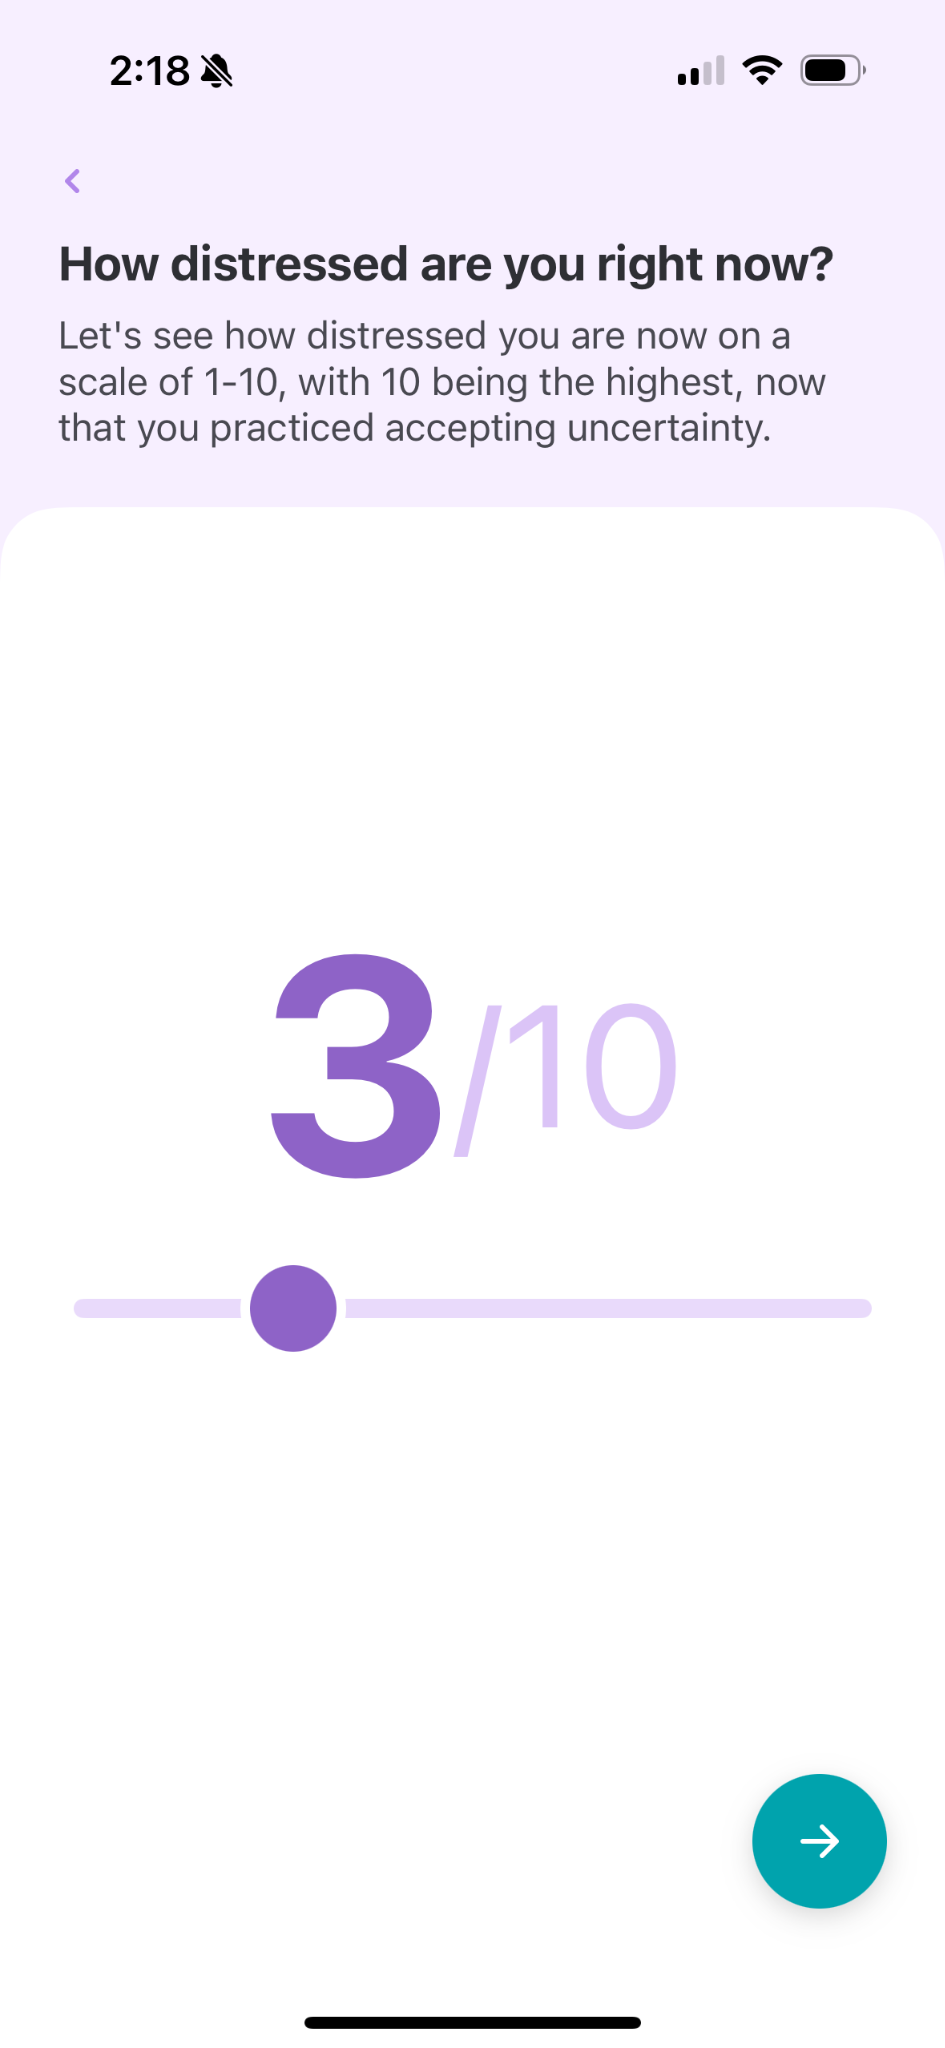

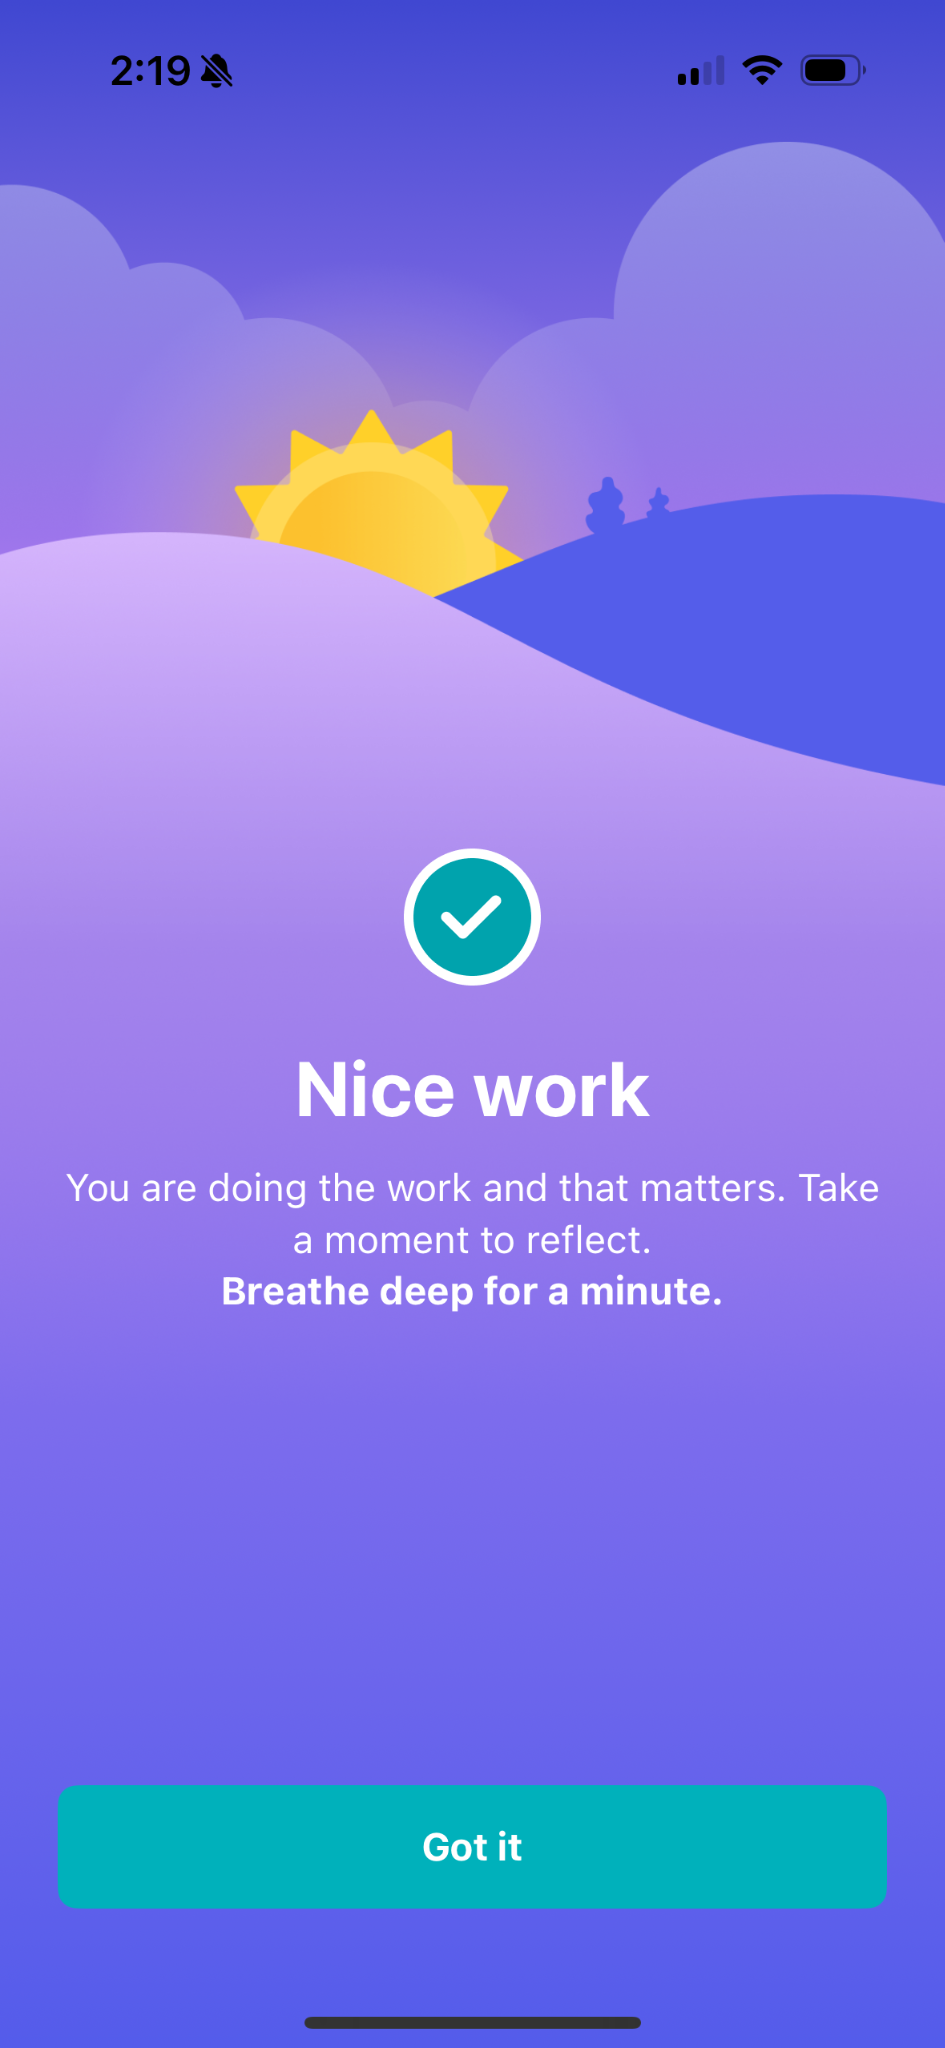

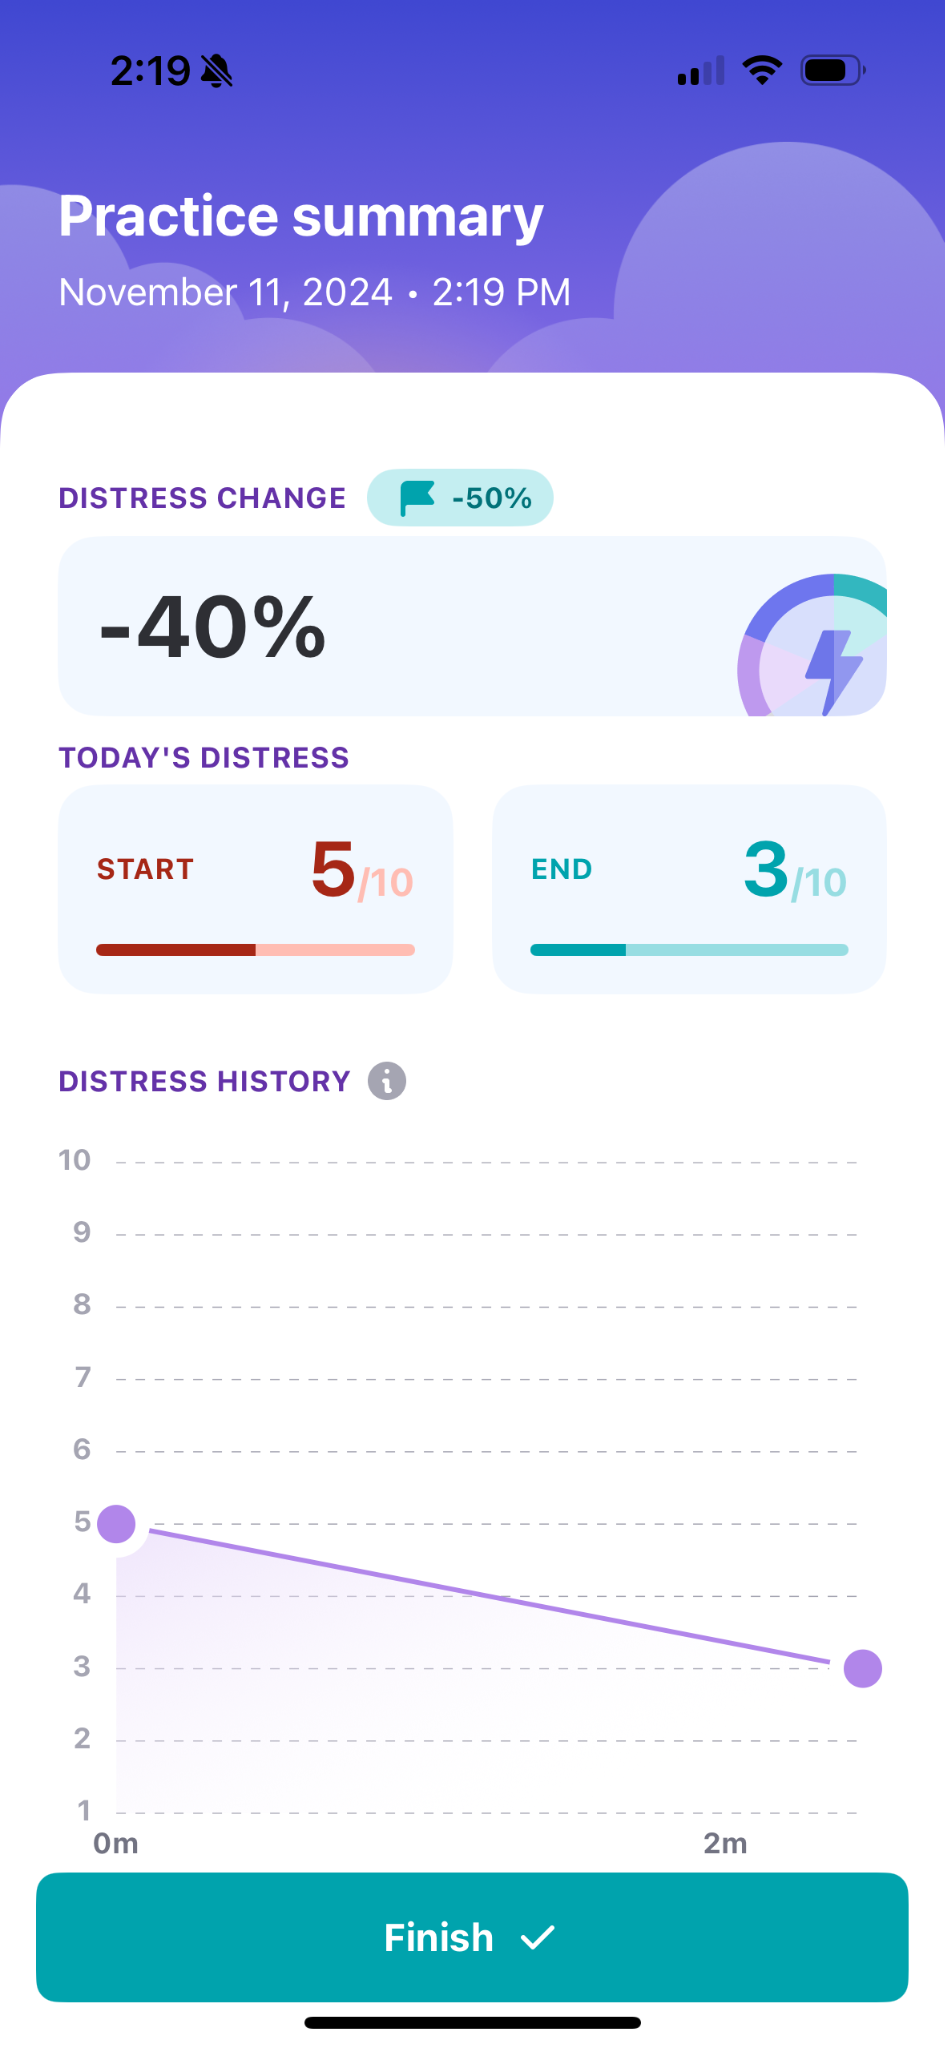


Fig. 5. NOCD App SOS feature
